# Supplementary material for: Effect of combination sequence of precursors on the structural and catalytic properties of Ti–SBA-15
Source: Royal Society of Chemistry journal article supplement (doi:10.1039/c3ra41304g), 2013-01-01
Supplement: c3ra41304g.pdf [file c3ra41304g.pdf]

## **Supporting Information**

### **Effect of Combination Sequence of Precursors on the Structural and Catalytic**

#### **Properties of Ti-SBA-15**

Feng-Ting Kuo,<sup>a</sup> Shih-Yuan Chen,<sup>a,b</sup> Tsung-Han Lin,<sup>a</sup> Jyh-Fu Lee<sup>c</sup> and Soofin Cheng<sup>\*a</sup>

<sup>a</sup> *Department of Chemistry, National Taiwan University, Taipei 106, Taiwan. FAX:*

*+886-2-23636359; Tel: +886-2-33661662; E-mail: [chem1031@ntu.edu.tw](mailto:chem1031@ntu.edu.tw)*

<sup>b</sup> *Research Center for New Fuels and Vehicle Technology, AIST, Tsukuba Central 5,*

*1-1-1 Higashi, Tsukuba 305-8565, Japan.*

<sup>c</sup> *Research Division, National Synchrotron Radiation Research Center, Hsinchu 300,*

*Taiwan.*

To whom the correspondence should be address:

Prof. Soofin Cheng

Department of Chemistry, National Taiwan University, Taipei 106, Taiwan.

TEL: +886-2-33661662

FAX: +886-2-33668671

E-mail: [chem1031@ntu.edu.tw](mailto:chem1031@ntu.edu.tw)

**Table S1.** Textural properties of 560°C calcined xTi-Si-2 and xSi-Ti-2 samples obtained from nitrogen physisorption isotherms.

| Entry | Materials   | $S_{BET}$<br>(m <sup>2</sup> /g) | $V_{Total}$<br>(cm <sup>3</sup> /g) | $D_p$ <sup>[a]</sup><br>(nm) | $W_t$ <sup>[b]</sup><br>(nm) |
|-------|-------------|----------------------------------|-------------------------------------|------------------------------|------------------------------|
| 1     | SBA-15      | 801                              | 0.97                                | 5.8                          | 4.6                          |
| 2     | 2Ti-Si-2    | 858                              | 1.1                                 | 5.9                          | 4.5                          |
| 3     | 4Ti-Si-2    | 874                              | 1.1                                 | 5.9                          | 4.5                          |
| 4     | 5Ti-Si-2    | 813                              | 1.0                                 | 5.9                          | 4.5                          |
| 5     | 8Ti-Si-2    | 824                              | 1.0                                 | 5.9                          | 4.7                          |
| 6     | 12.5Ti-Si-2 | 810                              | 1.0                                 | 5.9                          | 5.1                          |
| 9     | 2Si-Ti-2    | 796                              | 0.98                                | 6.0                          | 4.7                          |
| 10    | 4Si-Ti-2    | 837                              | 1.0                                 | 6.0                          | 5.0                          |
| 11    | 5Si-Ti-2    | 799                              | 1.0                                 | 6.0                          | 5.0                          |
| 12    | 8Si-Ti-2    | 870                              | 1.1                                 | 6.1                          | 4.5                          |
| 13    | 12.5Si-Ti-2 | 896                              | 1.1                                 | 6.1                          | 4.3                          |

<sup>[a]</sup> Pore diameter determined from peak position of BJH desorption PSD profile;

<sup>[b]</sup> Peak width at half maximum height of the BJH desorption PSD profile.

**Table S2.** Textural properties of 560°C calcined xTi-Si-1.5 and xSi-Ti-1.5 samples

| Materials   | $S_{BET}$<br>(m <sup>2</sup> /g) | $V_{Total}$<br>(cm <sup>3</sup> /g) | $D_p$ <sup>[a]</sup><br>(nm) | $W_t$ <sup>[b]</sup><br>(nm) |
|-------------|----------------------------------|-------------------------------------|------------------------------|------------------------------|
| 1Ti-Si-1    | 927                              | 1.08                                | 6.2                          | 4.5                          |
| 2Ti-Si-1    | 986                              | 1.16                                | 6.2                          | 4.4                          |
| 4Ti-Si-1    | 923                              | 1.12                                | 6.4                          | 4.2                          |
| 5Ti-Si-1    | 932                              | 1.13                                | 6.4                          | 4.2                          |
| 8Ti-Si-1    | 867                              | 1.05                                | 6.4                          | 4.6                          |
| 10Ti-Si-1   | 864                              | 1.00                                | 6.2                          | 4.3                          |
| 1Ti-Si-1.5  | 900                              | 1.07                                | 6.1                          | 4.5                          |
| 2Ti-Si-1.5  | 911                              | 1.09                                | 6.1                          | 4.5                          |
| 4Ti-Si-1.5  | 915                              | 1.11                                | 6.1                          | 4.9                          |
| 5Ti-Si-1.5  | 930                              | 1.11                                | 6.1                          | 4.6                          |
| 8Ti-Si-1.5  | 835                              | 1.02                                | 6.2                          | 4.5                          |
| 10Ti-Si-1.5 | 884                              | 1.05                                | 6.3                          | 4.4                          |

<sup>[a]</sup> Pore diameter determined from peak position of BJH desorption PSD profile;

<sup>[b]</sup> Peak width at half maximum height of the BJH desorption PSD profile.

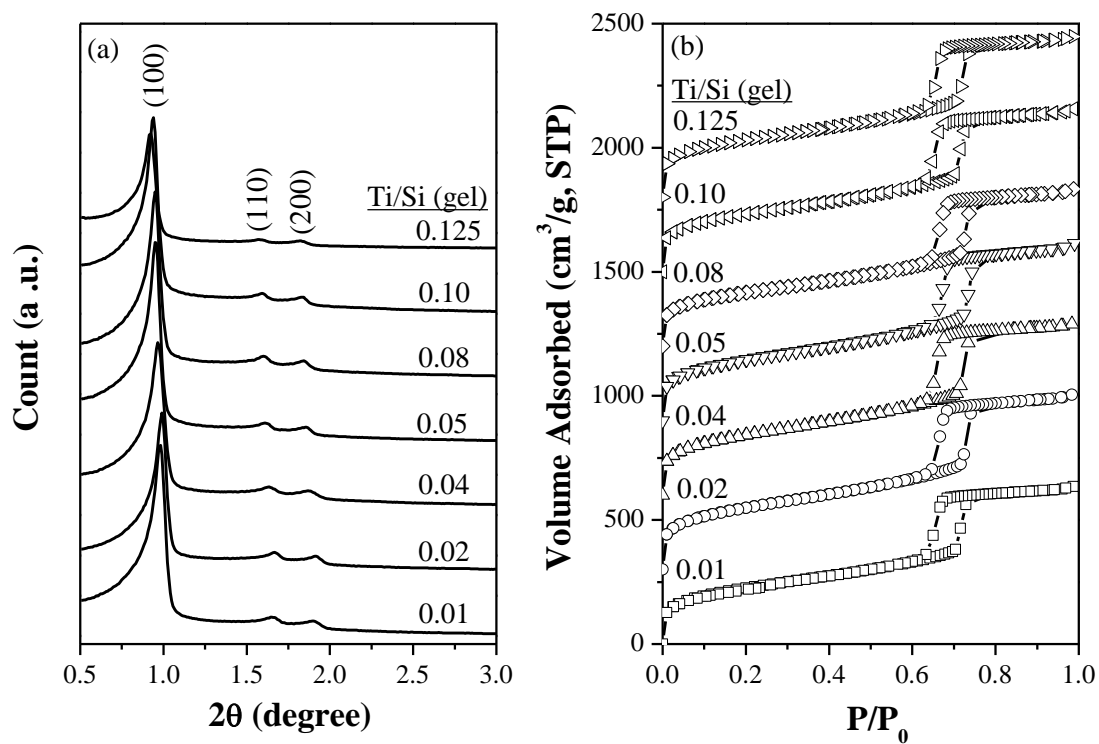

**Fig. S1.** (a) small-angle XRD and (b)  $\text{N}_2$  adsorption-desorption isotherms of calcined  $x\text{TiSi-2}$  samples. The displacements of the isotherms are shown by the points at  $P/P_0 = 0$ .

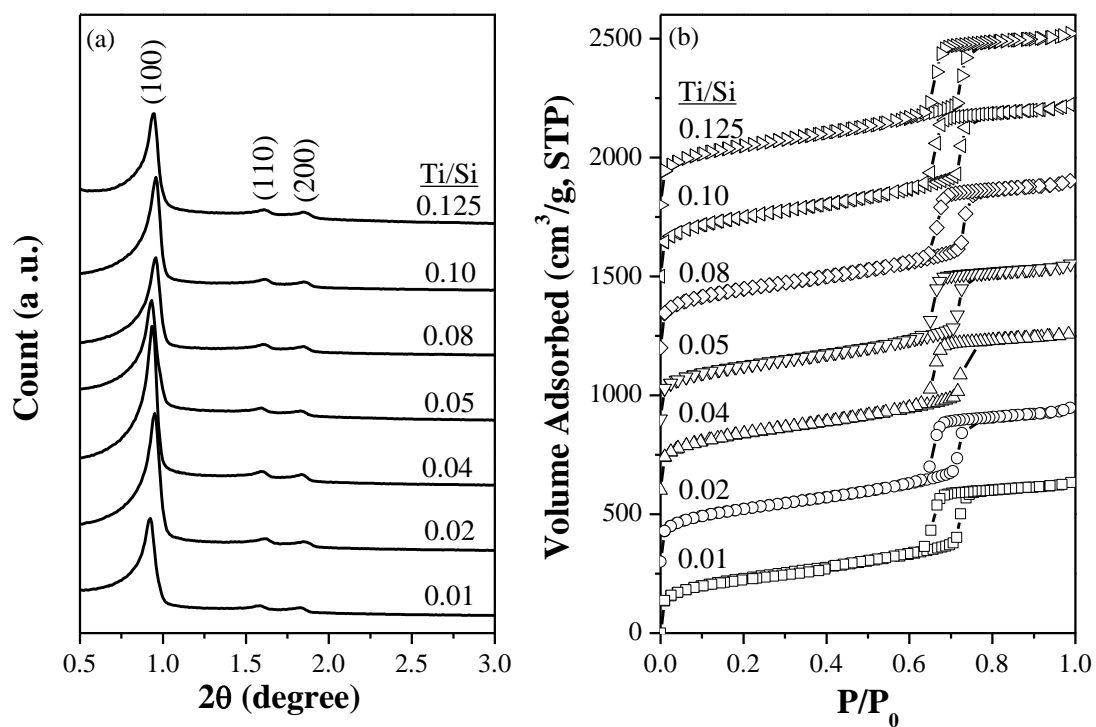

**Fig. S2.** (a) small-angle XRD and (b) N<sub>2</sub> adsorption-desorption isotherms of calcined xSiTi-2 samples. The displacements of the isotherms are shown by the points at  $P/P_0 = 0$ .

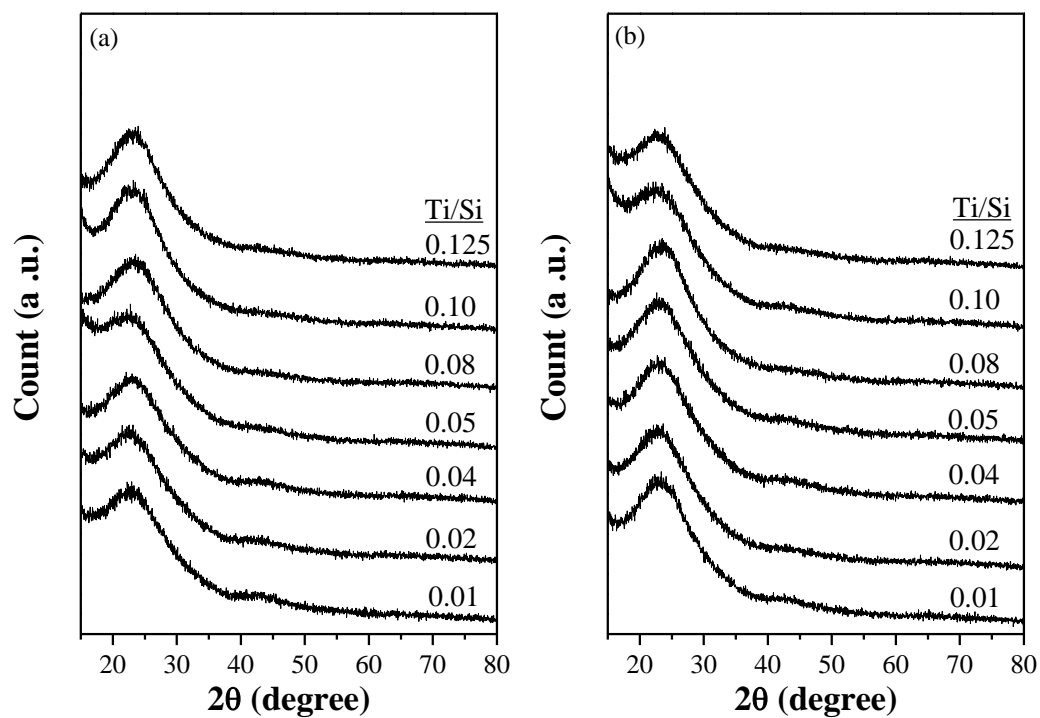

**Fig. S3.** Wide-angle XRD patterns of calcined samples: (a) xTiSi and (b) xSiTi.

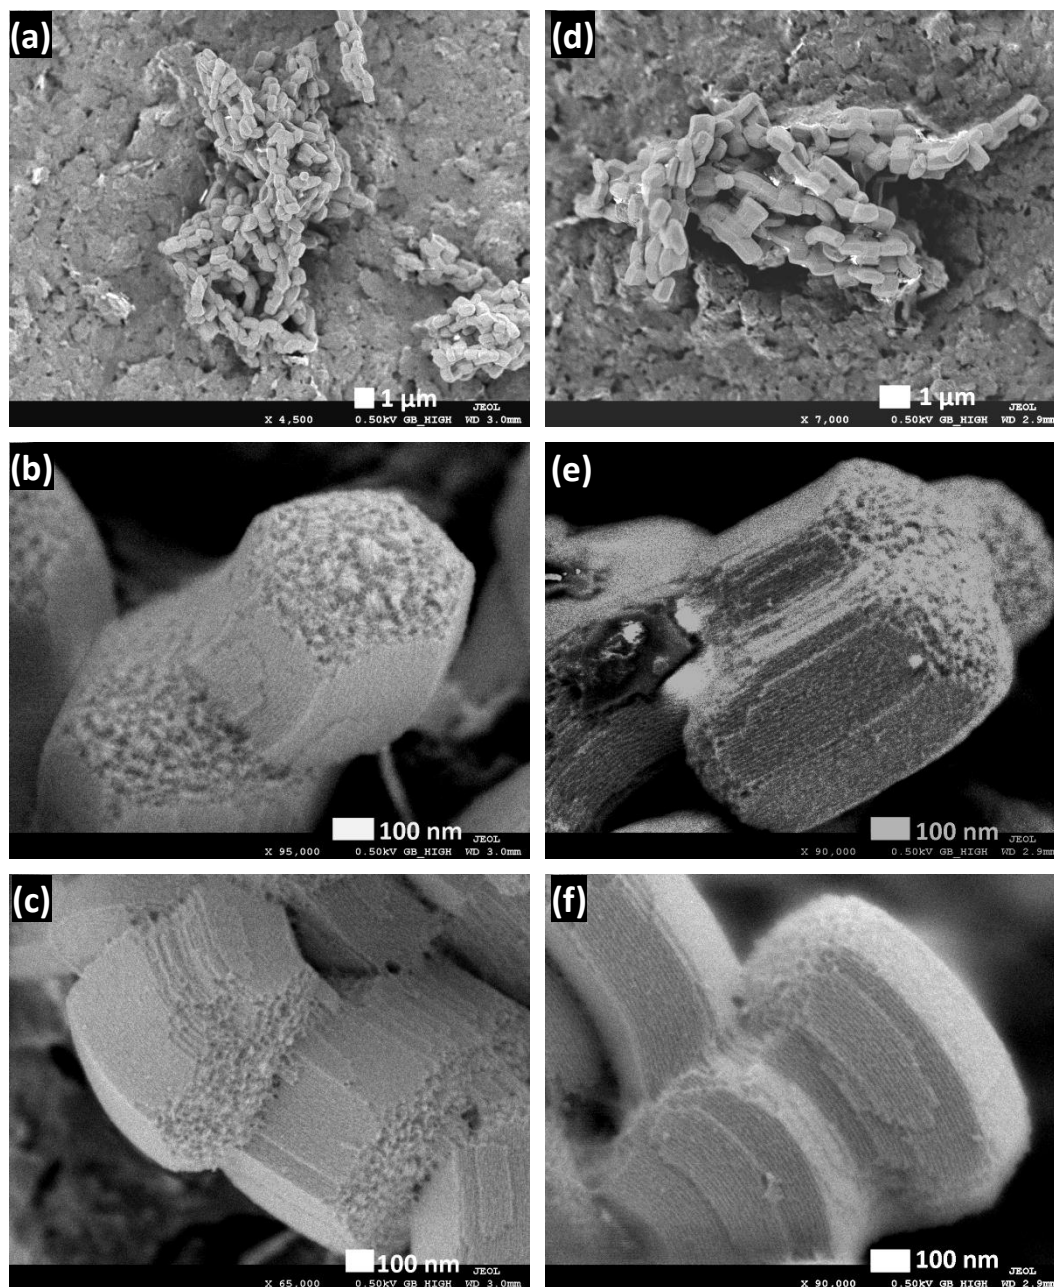

**Fig. S4.** HRSEM photos of calcined samples: (a-c) 12.5Ti-Si-2 and (d-f) 12.5Si-Ti-2.

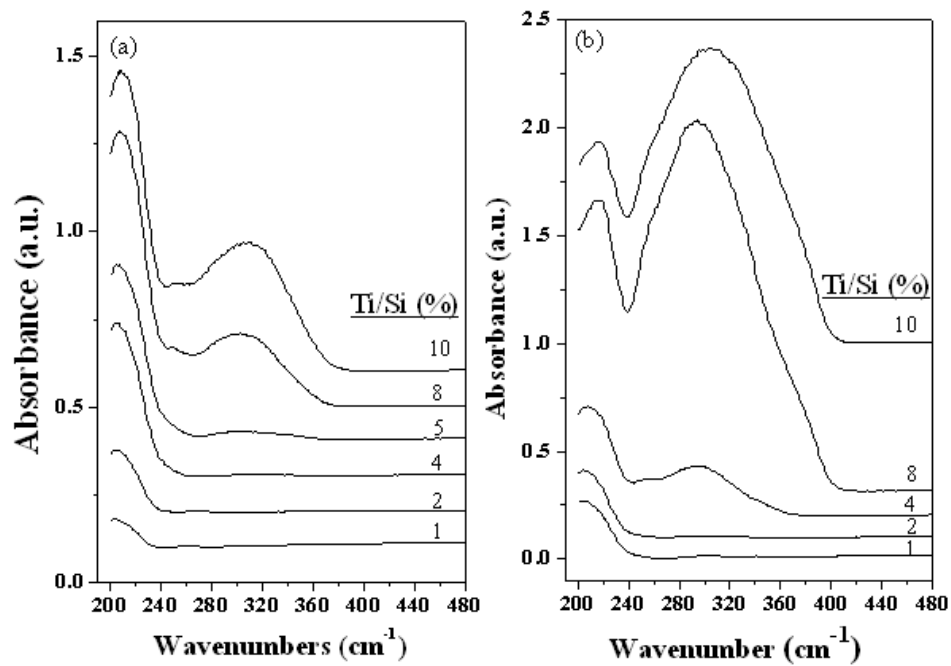

**Fig. S5.** DR UV-Vis spectra of 560°C calcined samples prepared at relatively higher pH values: (a) xTiSi-1.5 and (b) xTiSi-1
